36 **Abstract**

37 In a previous work we showed that the visual cortex tracks acoustic amplitude modulations  
38 accompanying lip movements during silently presented visual speech. Whether similar visuo-  
39 phonological transformation processes also exist for spectral modulations is unknown, which  
40 altogether could support the integration of auditory and visual cues for speech processing.  
41 Also, given increasing hearing difficulties in elderly individuals, we were interested in how  
42 these processes change as a function of age. Participants watched silent videos of a speaker  
43 and paid attention to the lip movements while being seated in the MEG. We found that the  
44 visual cortex not only tracks the unheard speech envelope, but also the unheard modulations  
45 of resonant frequencies (or formants) and the pitch (or fundamental frequency) linked to the  
46 lip movements, a process that is in general related to speech comprehension. Interestingly,  
47 only the processing of intelligible unheard formants decreases significantly with age in the  
48 visual and also in the cingulate cortex. This is not the case for the processing of the unheard  
49 speech envelope, the fundamental frequency or the purely visual information carried by lip  
50 movements. These results show that not only the global unheard speech envelope, but also  
51 unheard spectral fine-details are transformed from a mere visual to a phonological  
52 representation. Aging affects especially the ability to derive spectral dynamics at formant  
53 frequencies. Since listening in noisy environments should capitalize on the ability to track  
54 spectral fine-details, our results provide a novel focus on compensatory processes in such  
55 challenging situations.

## 56 **1 Introduction**

57 Speech understanding is a multisensory process that requires diverse modalities to work  
58 together for an optimal experience. Congruent audiovisual input is especially crucial for  
59 understanding speech in noise (Crosse et al., 2016; Sumbly & Pollack, 1954), highlighting the  
60 importance of visual cues in speech processing studies. One hypothesis is that activation from  
61 visual speech directly modulates activation in auditory cortex, although the results have been  
62 mixed and a lot of questions remain unanswered (Bernstein & Liebenthal, 2014; Keitel et al.,  
63 2020). One important question regards the nature of the representation in the visual cortex,  
64 and whether it is strictly visual or already tracks acoustic information that is associated with  
65 the visual input (for non-speech stimuli see e.g. Escoffier et al., 2015). A first approach to  
66 address this showed that occipital activation elicited by silent lip reading also reflects dynamics  
67 of the acoustic envelope (O'Sullivan et al., 2017). Further evidence that the visual cortex is  
68 able to track certain aspects of speech by visual cues alone comes from a recent study by  
69 Hauswald et al. (2018). Evidently, it has been shown that visual speech contributes  
70 substantially to audiovisual speech processing in the sense that the visual cortex is able to  
71 extract phonological information from silent lip movements in the theta-band (4-7 Hz).  
72 Crucially, this tracking is dependent on the intelligibility of the silent speech, with absent  
73 tracking when the silent visual speech is unintelligible. Another study supports the former  
74 findings and extends the present framework by providing evidence that the visual cortex  
75 passes information to the angular gyrus, which extracts slow features (below 1 Hz) from lip  
76 movements, which are then mapped onto auditory features and passed on to auditory cortices  
77 for better speech comprehension (Bourguignon et al., 2020). These findings underline the  
78 importance of slow frequency properties of visual speech for enhanced speech  
79 comprehension from both the delta (0.5-3 Hz) and theta-band (4-7 Hz), especially due to  
80 frequencies between 1-7 Hz being crucial for comprehension (Giraud & Poeppel, 2012).  
81 Moreover, the spectral profile of lip movements is also settled within this range (Park et al.,  
82 2016).

83 Recent behavioural evidence presents that spectral fine details can also be extracted by  
84 observation of lip movements (Plass et al., 2020). This raises the interesting question whether  
85 this information is also represented at the level of the visual cortex, analogous to the envelope  
86 as shown previously (Hauswald et al., 2018). Particularly relevant spectral fine details are  
87 formant peaks around 2500 Hz, which are indicated to be modulated in the front cavity (Badin  
88 et al., 1990). This corresponds to expansion and contraction of the lips (Plass et al., 2020),  
89 thus having a relationship with certain lip movements and could therefore be extracted for  
90 important phonological cues.

91 Furthermore, not only resonant frequencies, but also the fundamental frequency (or pitch  
92 contour) plays an important role in speech understanding in noisy environments (Hopkins et

93 al., 2008), and could potentially be extracted from silent lip movements. Whether the visual  
94 cortex is able to track formant and pitch information in (silent) visual speech, has not been  
95 investigated to date.

96 Knowledge on how the brain is processing speech is also vital when it comes to ageing,  
97 potentially with regards to age-related hearing loss (Lieberman, 2017). Several studies have  
98 investigated the influence of age on speech comprehension, with results that signify ageing  
99 is, in most cases, accompanied by listening difficulties, especially in noise (Tun & Wingfield,  
100 1999; Wong et al., 2009). Furthermore, while the auditory tracking of a speech-paced  
101 stimulation (~ 3 Hz) is less consistent in older adults compared to younger adults, alpha  
102 oscillations are enhanced in younger adults during attentive listening, suggesting declined top-  
103 down inhibitory processes that support selective suppression of irrelevant information (Henry  
104 et al., 2017). Older adults also indicate a compensatory mechanism when processing  
105 degraded speech especially in anterior cingulate cortex (ACC) and middle frontal gyrus (Erb  
106 & Obleser, 2013). Additionally, the temporal processing of auditory information is altered in  
107 the ageing brain, pointing to decreased selectivity for temporal modulations in primary auditory  
108 areas (Erb et al., 2020). Those studies reinforce a distinctive age-related alteration in  
109 processing auditory speech. This raises the question whether we also see an impact of age  
110 on audiovisual speech processing, an issue that has not been addressed so far.

111 Combining the important topics mentioned above, this study aims to answer two critical  
112 questions regarding audiovisual speech processing: First, we propose if the postulated visuo-  
113 phonological transformation process in visual cortex mainly represents global energy  
114 modulations (i.e. speech envelope) or if it also entails spectral fine details (like formant or pitch  
115 curves). Second, we argue if visuo-phonological transformation is subject to age-related  
116 decline. To the best of our knowledge, this study presents first neurophysiological evidence  
117 that the visual cortex is not only able to extract the unheard speech envelope, but also unheard  
118 formant and pitch information from lip movements. Crucially, we observed an age-related  
119 decline that mainly affects tracking of the formants (and to some extent the envelope and the  
120 fundamental frequency). Interestingly, we observed different tracking properties for different  
121 brain regions and frequencies: While tracking intelligible formants declines reliably in occipital  
122 and cingulate cortex for both delta and theta, we observed a decline of theta-tracking just in  
123 occipital cortex, suggesting different age-related effects in different brain regions. Our results  
124 suggest that the ageing brain deteriorates in deriving spectral fine-details linked to the visual  
125 input, a process that could contribute to perceptual difficulties in challenging listening  
126 situations.

## 127 **2 Materials and methods**

128

### 129 *2.1 Participants*

130 We recruited 50 participants (28 females; 2 left-handed; mean age: 37.96 years; SD: 13.33  
131 years, range: 19-63 years) for the experiment. All participants had normal or corrected-to-  
132 normal eyesight, self-reported normal hearing and no neurological disorders. All participants  
133 received either a reimbursement of €10 per hour or course credits for their participation. All  
134 participants signed an informed consent form. The experimental procedure was approved by  
135 the Ethics Committee of the University of Salzburg.

136

### 137 *2.2 Stimuli*

138 Videos were recorded with a digital camera (Sony NEX FS100) at a rate of 50 frames per  
139 second, the corresponding audio files were recorded at a sampling rate of 48 kHz. The videos  
140 were spoken by two female native German speakers. The stimuli were taken from the book  
141 “Das Wunder von Bern” (“The Miracle of Bern”; [https://www.aktion-](https://www.aktion-mensch.de/inklusion/bildung/bestellservice/materialsuche/detail?id=62)  
142 [mensch.de/inklusion/bildung/bestellservice/materialsuche/detail?id=62](https://www.aktion-mensch.de/inklusion/bildung/bestellservice/materialsuche/detail?id=62)) which was provided  
143 in an easy language. The easy language does not include any foreign words, has a coherent  
144 verbal structure and is facile to understand. We used simple language to avoid that limited  
145 linguistic knowledge is interfering with possible lip reading abilities. 24 pieces of text were  
146 chosen from the book and recorded from each speaker, lasting between 33 and 62 seconds,  
147 thus resulting in 24 videos. Additionally, all videos were reversed, which resulted in 24 forward  
148 videos and 24 corresponding backward videos. Forward and backward audio files were  
149 extracted from the videos and used for the data analysis. Half of the videos were randomly  
150 selected to be presented forward and the remaining half to be presented backward. The videos  
151 were back-projected on a translucent screen in the centre of the screen by a Propixx DLP  
152 projector (VPixx technologies, Canada) with a refresh rate of 120 Hz per second and a screen  
153 resolution of 1920 x 1080 pixels. The translucent screen was placed ~110 cm in front of the  
154 participant and had a screen diagonal of 74 cm. One speaker was randomly chosen per  
155 subject and kept throughout the experiment, so each participant only saw one speaker.

156

### 157 *2.3 Procedure*

158 Participants were first instructed to take part in an online study, in which their behavioural lip  
159 reading abilities were tested, and in which they were asked about their subjective hearing  
160 impairment. This German lip reading test is available as SaLT (Salzburg Lipreading Test)  
161 (Suess et al., 2021). Participants were presented with silent videos of numbers, words and  
162 sentences and could watch every video twice. They then had to write down the words they  
163 thought they had understood from the lip movements. This online test lasted approximately 40

164 minutes and could be conducted at home or right before the experiment in the MEG-lab. After  
165 completing the behavioural experiment, the MEG experiment started. Participants were  
166 instructed to pay attention to the lip movements of the speakers and passively watch the mute  
167 videos. They were presented with 6 blocks of videos, and in each block, 2 forward and 2  
168 backward videos were presented in a random order. The experiment lasted about an hour  
169 including preparation. The experimental procedure was programmed in Matlab with the  
170 Psychtoolbox-3 (Brainard, 1997) and an additional class-based abstraction layer  
171 ([https://gitlab.com/thht/o\\_ptb](https://gitlab.com/thht/o_ptb)) programmed on top of the Psychtoolbox (Hartmann & Weisz,  
172 2020).

173

#### 174 *2.4 Data acquisition*

175 Brain activity was measured using a 306-channel whole head MEG system with 204 planar  
176 gradiometers and 102 magnetometers (Neuromag TRIUX, Elekta), a sampling rate of 1000  
177 Hz and an online highpass-filter of 0.1 Hz. Before entering the magnetically shielded room  
178 (AK3B, Vakuumschmelze, Hanau, Germany), the head shape of each participant was  
179 acquired using approximately 500 digitized points on the scalp, including fiducials (nasion, left  
180 and right pre-auricular points) with a Polhemus Fastrak system (Polhemus, Vermont, USA).  
181 The head position of each individual participant relative to the MEG sensors was controlled  
182 once before each experimental block. Vertical and horizontal eye movements and  
183 electrocardiographic data was also recorded, but not used for preprocessing. The continuous  
184 MEG data was then preprocessed off-line with the signal space separation method from the  
185 Maxfilter software (Elekta Oy, Helsinki, Finland) to correct for different head positions across  
186 blocks and to suppress external interference (Taulu et al., 2005).

187

#### 188 *2.5. Data analysis*

189

##### 190 *2.5.1 Preprocessing*

191 Acquired datasets were analysed using the Fieldtrip toolbox (Oostenveld et al., 2011). The  
192 maxfiltered MEG data were highpass-filtered at 1 Hz using a finite impulse response (FIR)  
193 filter (Kaiser window, order 440). For extracting physiological artefacts from the data, 60  
194 principal components were calculated. Via visual inspection, the components displaying eye  
195 movements, heartbeat and external power noise from the nearby train tracks (16.67 Hz) were  
196 removed from the data. We removed on average 2.24 components per participant ( $SD = 0.65$ ).  
197 The data were then lowpass-filtered at 30 Hz and corrected for the delay between the stimulus  
198 computer and the screen inside the chamber (9 ms for each video). We then resampled the  
199 data to 150 Hz and segmented them in 2-second trials to increase the signal-to-noise ratio.

200

## 201 2.5.2 Source projection of MEG data

202 We used either a standard structural brain from the Montreal Neurological Institute (MNI,  
203 Montreal, Canada) or, where possible, the individual structural MRI (20 participants) and  
204 warped it to match the individual's fiducials and head shape as accurately as possible (Mattout  
205 et al., 2007). A 3-D grid with 1-cm resolution and 2982 voxels based on an MNI template brain  
206 was morphed into the brain volume of each participant. This allows group-level averaging and  
207 statistical analysis as all the grid points in the warped grid belong to the same brain region  
208 across subjects. These aligned brain volumes were also used for computing single-shell head  
209 models and leadfields (Nolte, 2003). By using the leadfields and the common covariance  
210 matrix (pooling data from all blocks), a common LCMV beamformer spatial filter was computed  
211 (Veen et al., 1997).

212

## 213 2.5.3 Extraction of lip area, acoustic speech envelope, formants and pitch

214 The lip area of the visual speech was extracted using a MATLAB script adapted from Park et  
215 al. (2016). This data was then upsampled to 150 Hz to match the downsampled preprocessed  
216 MEG signal. The acoustic speech envelope was extracted with the Chimera toolbox from the  
217 audio files corresponding to the videos which constructs nine frequency bands in the range of  
218 100-10000 Hz as equidistant on the cochlear map (Smith et al., 2002). Then the sound stimuli  
219 were band-pass filtered in these bands with a 4th-order Butterworth filter to avoid edge  
220 artefacts. For each of the frequency bands, the envelopes were calculated as absolute values  
221 of the Hilbert transform and then averaged to get the full-band envelope for coherence analysis  
222 (Gross et al., 2013; Keitel et al., 2017). This envelope was then downsampled to 150 Hz to  
223 match the preprocessed MEG signal. The resonant frequencies (or formants) were extracted  
224 using the Burg method implemented in Praat 6.0.48 (Boersma & Weenink, 2019). Up to 5  
225 formants were extracted from each audio file to make sure that the relevant formants were  
226 extracted thoroughly. For analysis purposes, just F2 and F3 were averaged and used. Those  
227 two formants fluctuate around 2500 Hz and tend to merge into a single peak when pronouncing  
228 certain consonant-vowel combinations (Badin et al., 1990). The mentioned merging process  
229 is taking place in the front region of the oral cavity and can therefore also be seen by observing  
230 lip movements (Plass et al., 2020). The formants were extracted at a rate of 200 Hz for the  
231 sake of simplicity and then downsampled to 150 Hz. The pitch (or fundamental frequency,  $f_0$ )  
232 was extracted using the Matlab Audio Toolbox function *pitch.m* with default options (extraction  
233 between 50 and 400 Hz) at a rate of 100 Hz and then upsampled to 150 Hz.

234

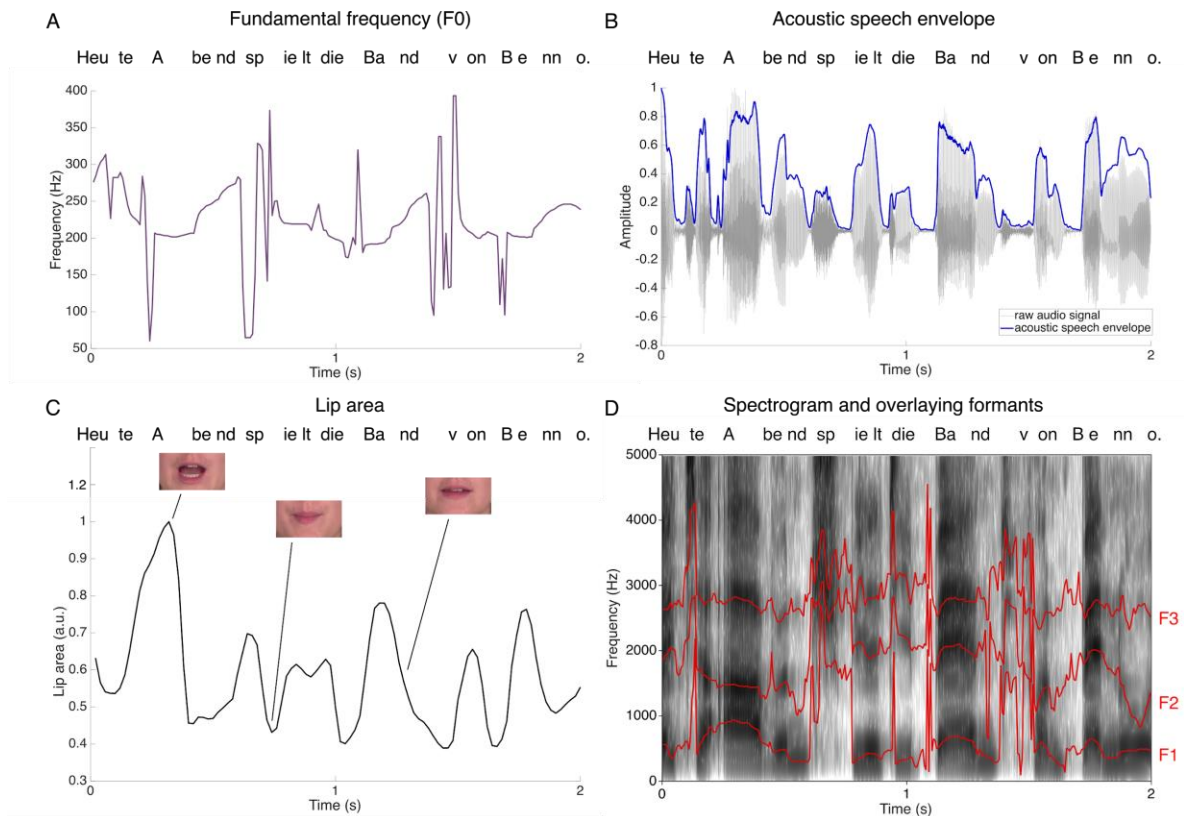

235

236 *Figure 1: Example time series for a 2 second forward section of all the parameters used for*  
237 *coherence calculation. A) Example time series of the fundamental frequency extracted with*  
238 *the pitch.m MATLAB function. B) Example audio signal and the acoustic speech envelope (in*  
239 *blue). C) Lip area extracted from the video frames with the MATLAB script adapted from Park*  
240 *et al. (2016). D) Example spectrogram with overlaying formants (F1-F3, red lines) extracted*  
241 *with Praat.*

242

#### 243 2.5.4 Coherence calculation

244 We calculated the cross-spectral density between the lip area, the unheard acoustic speech  
245 envelope, the averaged F2 and F3 formants and the pitch and every virtual sensor with a multi-  
246 taper frequency transformation (1-25 Hz in 0.5 Hz steps, 3 Hz smoothing). Then we calculated  
247 the coherence between the activity of every virtual sensor and the lip area, the acoustic speech  
248 envelope, the averaged formant curve of F2 and F3 and the pitch curve, which we will refer to  
249 as lip-brain coherence, envelope-brain coherence, formant-brain coherence and pitch-brain  
250 coherence, respectively, in the manuscript.

251

#### 252 2.6 Statistical analysis

253 To test for differences in source space in occipital cortex for forward and backward coherence  
254 values, we extracted all voxels labeled as “occipital cortex” in the Automated Anatomical  
255 Labeling (AAL) atlas (Tzourio-Mazoyer et al., 2002) for a predefined region-of-interest analysis



256 (Hauswald et al., 2018). We then contrasted forward and backward conditions using two-tailed  
257 dependent-samples *t*-tests on the averaged coherence values for the frequency bands of  
258 interest (1-7 Hz). This was done separately for the lip-brain coherence, the envelope-brain  
259 coherence, the formant-brain coherence and the pitch-brain coherence. In a first step, we  
260 decided to average over the delta (1-3 Hz) and theta (4-7 Hz) frequency bands since they  
261 carry important information in general on speech processing (phrasal and syllabic processing,  
262 respectively) (Giraud & Poeppel, 2012). Moreover, previous studies investigated lip movement  
263 related activity either in the delta-band (Bourguignon et al., 2020; Park et al., 2016) or the  
264 theta-band (Hauswald et al., 2018), leading us to also do a follow-up analysis separately for  
265 the different frequency bands (described later in this section).

266 To generate a normalized contrast between processing of forward (intelligible) and backward  
267 (unintelligible) lip movements, we subtracted the backward coherence values from the forward  
268 coherence values for our respective measures (lip-brain coherence, unheard speech  
269 envelope-brain coherence, unheard formant-brain coherence and unheard pitch-brain  
270 coherence). From now on, we refer to this normalized contrast as “Intelligibility index”, which  
271 quantifies the differences in coherence between intelligible and unintelligible visual speech.

272 For testing the relationship between the four different intelligibility indices (lip-brain, envelope-  
273 brain, formant-brain and pitch-brain) and age, we conducted a voxelwise correlation with age.

274 To control for multiple comparisons, we used a non-parametric cluster-based permutation test  
275 (Maris & Oostenveld, 2007). Here, clusters of correlation coefficients being significantly  
276 different from zero (showing *p*-values < 0.05) were identified and their respective *t*-values were  
277 extracted and summed up to get a cluster-level test statistic. Random permutations of the data  
278 were then drawn by reordering the behavioural data (in our case age) across participants.

279 After each permutation, the maximum cluster level *t*-value was recorded, generating a  
280 reference distribution of cluster-level *t*-values (using a Monte Carlo procedure with 1000  
281 permutations). Cluster *p*-values were estimated as the proportion of cluster *t*-values in the

282 reference distribution exceeding the cluster *t*-values observed in the actual data. Significant  
283 voxels (which were only found in the correlation between the formant-brain index and age)

284 were then extracted and averaged for data-driven ROIs (occipital cortex and cingulate cortex)  
285 which were defined using the Automated Anatomical Labeling (AAL) atlas (Tzourio-Mazoyer  
286 et al., 2002). These data-driven ROIs were then applied to all intelligibility indices to make the

287 ROI analysis comparable. We then fitted four linear models using the function *lm* from the  
288 stats package in R to investigate if age could predict the change in the calculated intelligibility

289 indices and to visualize the statistical effects of the whole brain analysis. To further clarify the  
290 relationship between age and the processing of intelligible and unintelligible lip movements

291 and to unravel the dynamics in our whole brain correlation analysis, we split our participants  
292 into two groups by the median (young: people < 37, N=25, older: people > 37, N=25). We then

293 calculated a repeated-measures ANOVA with 2 conditions: age (young vs. older) and  
294 intelligibility (forward vs. backward visual speech) for our data-driven ROIs separately  
295 (occipital cortex and cingulate cortex) using the *stats* package in R. To further investigate the  
296 effects between age and intelligibility, we conducted post-hoc tests with Bonferroni correction  
297 using the function *PostHocTest*. The last step consisted of a follow-up analysis where we  
298 decided to separate the averaged frequency-bands (delta and theta) again to unravel possible  
299 differences of our effect dependent on the frequency-band. We again conducted a voxelwise  
300 correlation with age separately for the delta-band (1-3 Hz) and for the theta-band (4-7 Hz) with  
301 the already described non-parametric cluster-based permutation test for all described  
302 intelligibility indices. Finally, we extracted the values from the voxel with the lowest *t*-value (for  
303 the delta and theta-band, respectively) and fitted a linear model again to investigate if age  
304 could predict the change in the intelligibility indices and to visualize the statistical effects of the  
305 whole brain analysis.

## 306 **3 Results**

307

### 308 **3.1 Behavioural results**

309 We investigated participants' lip reading abilities in a separate experiment that was conducted  
310 before the MEG session. They were presented with silent videos of spoken numbers, words,  
311 and sentences, and the task was to write down what they had understood just from the lip  
312 movements alone. A detailed description of the behavioural task will be published in a  
313 separate paper (Suess et al., 2021). 43 of the 50 participants completed the behavioural  
314 experiment. 4 people had to be excluded because there were problems with the data  
315 acquisition and their answers were not saved. While the recognition rate for the numbers were  
316 high ( $M = 60.83\%$ ,  $SE = 2.93\%$ ), lip reading abilities for complex stimuli (words and sentences)  
317 were low in general (words:  $M = 30.57\%$ ,  $SE = 1.82\%$ ; sentences:  $M = 8.83\%$ ,  $SE = 1.26\%$ ).  
318 Participants had an average total score of  $33.41\%$  ( $SE = 1.75\%$ , Figure 2A). Investigating if  
319 age could predict the total test score revealed that those two variables were uncorrelated ( $F(1,$   
320  $37) = .191$ ,  $p = .664$ ,  $R^2 = -0.021$ ), Figure 2B), showing that in our sample, behavioural lip  
321 reading abilities are not changing with age. This is consistent with our study on general lip  
322 reading abilities in the German language (Suess et al., 2021), but different to other studies  
323 indicating higher lip reading abilities in younger individuals (Feld & Sommers, 2009; Tye-  
324 Murray et al., 2007b). Participants also completed a questionnaire on subjective hearing  
325 impairment (APHAB, Löhler et al., (2014)). Further investigating the relationship between  
326 subjective hearing impairment and test score also revealed no significant effect ( $F(1, 37) =$   
327  $.104$ ,  $p = .75$ ,  $R^2 = -0.024$ ) in the current sample. This is in line with studies investigating  
328 hearing impairment in older adults (Tye-Murray et al., 2007a), but not supporting our own  
329 results which show a relationship between self-reported hearing impairment and lip reading  
330 abilities (Suess et al., 2021). However, as the current study was aiming to test normal hearing  
331 individuals with restricted variance in hearing impairment, those results cannot be compared  
332 directly to Suess et al. (2021), which also included individuals with severe hearing loss as well  
333 as prelingually deaf individuals.

334

### 335 **3.2 Visuo-phonological transformation is carried by both tracking of global envelope** 336 **and spectral fine-details during presentation of intelligible silent lip movements**

337 We calculated the coherence between the MEG data and the lip envelope, the unheard  
338 acoustic speech envelope, the unheard resonant frequencies and the unheard pitch (from now  
339 on called lip-brain coherence, envelope-brain coherence, formant-brain coherence, and pitch-  
340 brain coherence, respectively). As the visuo-phonological transformation process is likely  
341 taking place in visual areas (Hauswald et al., 2018), we defined the occipital cortex using the  
342 AAL atlas (Tzourio-Mazoyer et al., 2002) as a predefined region-of-interest and averaged over

343 all voxels from this ROI. We then compared the mean for the coherence of the presented  
344 forward videos (intelligible lip movements) with the mean of the presented backward videos  
345 (unintelligible lip movements) separately for the lip-brain coherence, the envelope-brain  
346 coherence, the formant-brain coherence and the pitch-brain coherence. While there was no  
347 significant difference in lip-brain coherence for intelligible and unintelligible visual speech ( $t(49)$   
348 = 0.396,  $p = 0.694$ ,  $d = 0.056$ ), we found a significant difference in unheard envelope-brain  
349 coherence for intelligible and unintelligible visual speech ( $t(49) = 2.679$ ,  $p = 0.01$ ,  $d = 0.379$ ).  
350 Most importantly, we found a significant difference also for the unheard formant-brain  
351 coherence ( $t(49) = 2.039$ ,  $p = 0.047$ ,  $d = 0.288$ ) and for the unheard pitch-brain coherence for  
352 intelligible and unintelligible visual speech ( $t(49) = 2.91$ ,  $p = 0.005$ ,  $d = 0.411$ , all in Figure 2C).  
353 The results on the tracking of lip movements are in line with former findings, showing that the  
354 visual cortex tracks these regardless of intelligibility, but point to different tracking properties  
355 dependent on the intelligibility of the unheard speech envelope. Interestingly, we show here  
356 that the visual cortex is also able to distinguish between intelligible and unintelligible formants  
357 (or resonant frequencies) and pitch (or F0) modulations extracted from the spectrogram,  
358 showing that also spectral details are extracted from visual speech and represented at the  
359 level of the visual cortex.

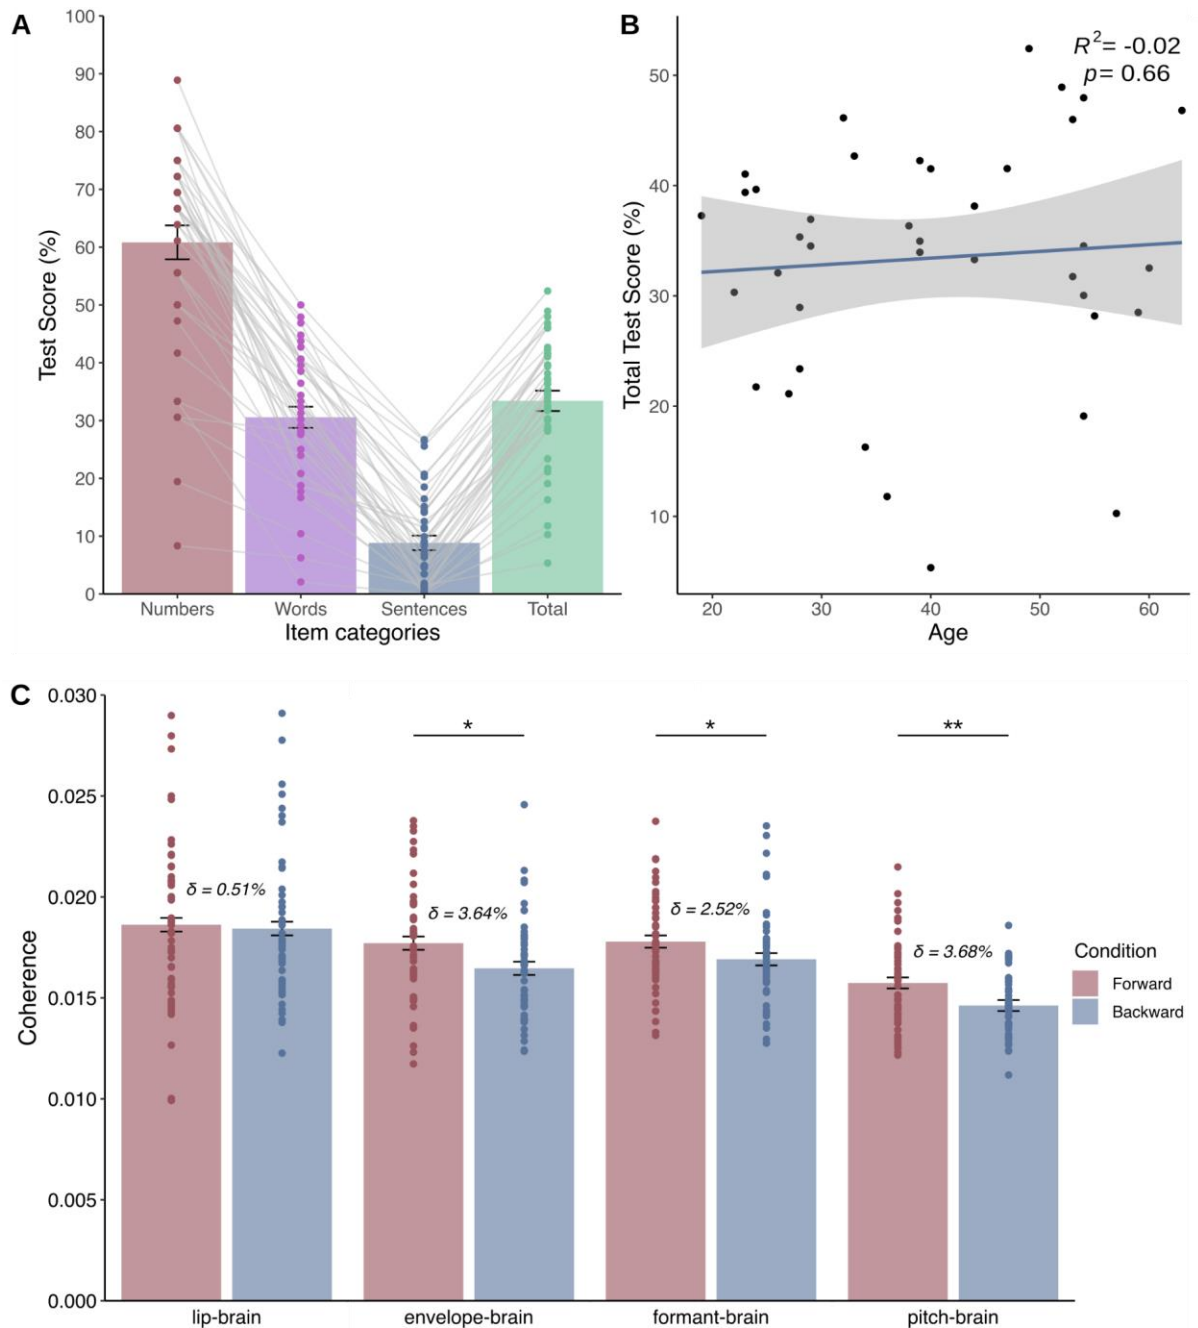

360

361 *Figure 2: Behavioural data and comparison of information tracking in visual cortex. A)*  
 362 *Behavioural lip reading abilities. Participants recognized numbers the most, followed by words*  
 363 *and sentences. B) Correlation between age and total test score revealed no significant*  
 364 *correlation ( $p = 0.66$ ), suggesting that lip reading abilities do not change with age. Blue line*  
 365 *depicts regression line, shaded areas depict standard error of mean (SE). C) Mean values*  
 366 *extracted from all voxels in occipital cortex showing no significant differences in lip-brain*  
 367 *coherence ( $p = 0.694$ ), but showing significant differences in unheard envelope-brain*  
 368 *coherence ( $p = 0.01$ ), formant-brain coherence ( $p = 0.047$ ) and unheard pitch-brain coherence*  
 369 *( $p = 0.005$ ) between forward and backward presentation of visual speech. Error bars represent*

370 1 standard error of mean for within-subject designs (O'Brien & Cousineau, 2014),  $\delta$  indicates  
371 the relative change between forward and backward conditions in percent.

372

### 373 **3.3 Spectral fine-detail tracking rather than global envelope tracking is altered in the** 374 **ageing population**

375 We were then interested in how the visuo-phonological transformation process is influenced  
376 by age. So we calculated a voxelwise correlation between the intelligibility index (difference  
377 between coherence for forward videos and coherence for backward videos) separately for our  
378 coherence indices (lip-brain, envelope-brain, formant-brain and pitch-brain) and the age of the  
379 participants. We neither found a significant correlation between the intelligibility index of the  
380 lip-brain coherence and age ( $p = 1$ , cluster-corrected) nor between the intelligibility index of  
381 the unheard envelope-brain coherence and age ( $p = 0.09$ , cluster-corrected). Also, the  
382 correlation between the intelligibility index of the unheard pitch-brain coherence was  
383 statistically not significant ( $p = 0.07$ , cluster-corrected). However, the overall trend for the  
384 envelope-brain and the pitch-brain coherence was to decline with age. Interestingly, we did  
385 find a significant negative correlation between the intelligibility index of the unheard formant-  
386 brain coherence and age ( $p = 0.002$ , cluster-corrected), strongest in occipital cortex and  
387 cingulate cortex (lowest  $t$ -value:  $-4.124$ , MNI [40 -90 0], Figure 3A). To further investigate the  
388 effects, we extracted the voxels showing a statistical effect in our whole brain analysis (Figure  
389 3A) and divided them into occipital voxels and voxels from the cingulate cortex using the AAL  
390 atlas (Tzourio-Mazoyer et al., 2002).

391 To investigate how strong the relationship between age and the different intelligibility indices  
392 is in our ROIs, we fitted four separate linear models. We started with the lip-brain index to  
393 exclude the possibility that our effect is due to visual processing. We found that age could not  
394 predict the lip-brain intelligibility index in any of the chosen ROIs (occipital cortex:  $F(1, 48) =$   
395  $0.124$ ,  $p = 0.727$ ,  $\eta^2 = 0.002$ , Figure 3C; cingulate cortex:  $F(1, 48) = 0.825$ ,  $p = 0.368$ ,  $\eta^2 =$   
396  $0.017$ , Figure 3F). On the contrary, we found that age could significantly predict the decrease  
397 in the formant-brain intelligibility index in both occipital areas ( $F(1, 48) = 33.59$ ,  $p = 5.14e-07$ ,  
398  $\eta^2 = 0.412$ , Figure 3B) and cingulate cortex ( $F(1, 48) = 26.42$ ,  $p = 4.99e-06$ ,  $\eta^2 = 0.355$ , Figure  
399 3E), suggesting an altered tracking process for the formants in ageing. Further fitting linear  
400 models to investigate the effects in our ROIs for the envelope-brain coherence and the pitch-  
401 brain coherence revealed that age could not significantly predict the envelope-brain index in  
402 occipital ( $F(1, 48) = 1.638$ ,  $p = 0.207$ ,  $\eta^2 = 0.033$ ) or cingulate cortex ( $F(1, 48) = 0.681$ ,  $p =$   
403  $0.413$ ,  $\eta^2 = 0.014$ ) and also not the pitch-brain index in occipital cortex ( $F(1, 48) = 2.584$ ,  $p =$   
404  $0.114$ ,  $\eta^2 = 0.051$ ). However, age could significantly predict the pitch-brain index in cingulate  
405 cortex ( $F(1, 48) = 6.972$ ,  $p = 0.011$ ,  $\eta^2 = 0.127$ ). The lack of tracking differences between  
406 intelligible and unintelligible lip movements suggests that the visual cortex processes basic

407 visual properties of lip movements, but that there are differential processing strategies for  
 408 acoustic information associated with these lip movements. These results also suggest that  
 409 processing of the pitch (or fundamental frequency) is altered to some extent in the ageing  
 410 population, at least in cingulate cortex. In summary, the correlation between the envelope-  
 411 brain index and age and the pitch-brain index and age seem to show a tendency in line with  
 412 the relationship between the formant-brain index and age in the whole brain analysis. We see  
 413 that effect sizes are biggest for the formant-brain index (occipital  $\eta^2 = 0.412$ , cingulate  $\eta^2 =$   
 414  $0.355$ ), followed by the pitch-brain index (occipital  $\eta^2 = 0.051$ , cingulate  $\eta^2 = 0.127$ ). Lower  
 415 effect sizes are found for the envelope-brain index (occipital  $\eta^2 = 0.033$ , cingulate  $\eta^2 = 0.014$ )  
 416 and the lip-brain index (occipital  $\eta^2 = 0.002$ , cingulate  $\eta^2 = 0.017$ ) after extracting voxels from  
 417 the data-driven ROI, adding to the evidence of a differential processing of speech properties  
 418 in age.  
 419

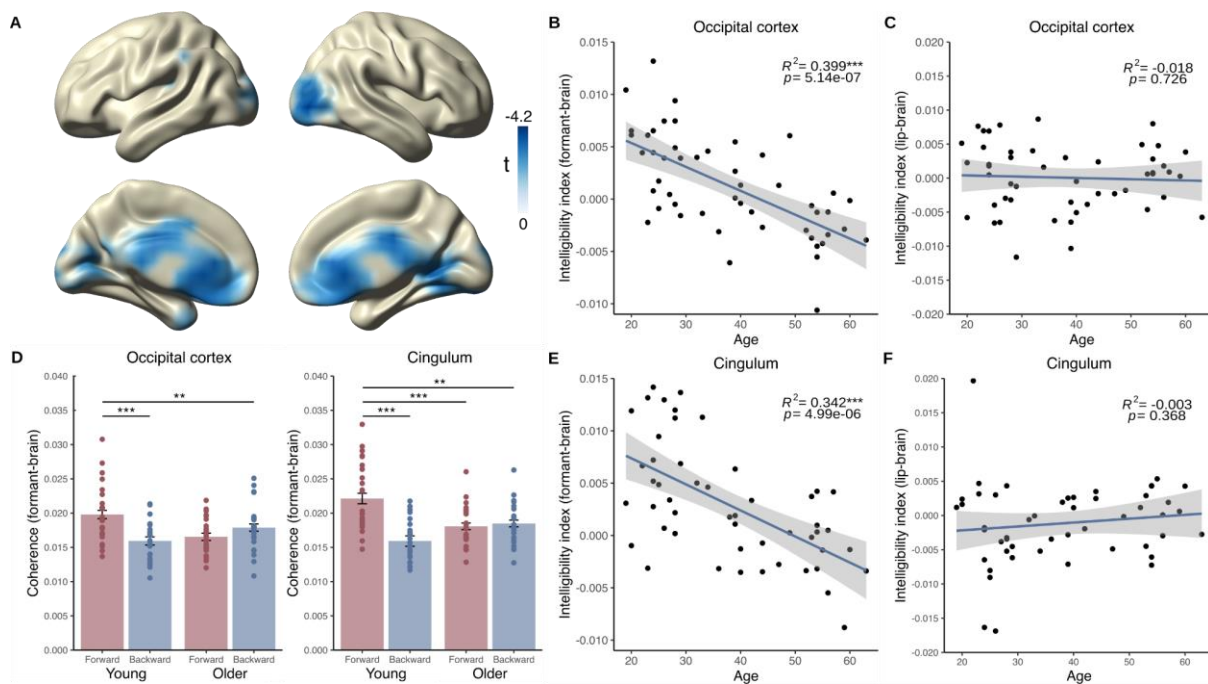

420  
 421 *Figure 3: Correlation between age and intelligibility index (i.e. difference in forward vs.*  
 422 *backward tracking) and comparison of age-groups. A) Statistical values of the voxelwise*  
 423 *correlation of the intelligibility index (forward formant-brain coherence - backward formant-*  
 424 *brain coherence) with age (averaged over 1-7 Hz,  $p < 0.05$ , cluster-corrected) showing a*  
 425 *strong decrease of intelligibility tracking in occipital regions and in cingulate cortex. B)*  
 426 *Correlation of formant-brain intelligibility index in significant occipital voxels extracted from A*  
 427 *showing a significant correlation with age ( $p = 5.14e-07$ ). C) Correlation of lip-brain intelligibility*  
 428 *index in significant occipital voxels extracted from A showing a not significant correlation with*  
 429 *age ( $p = 0.726$ ). D) Formant-brain coherence separated for age and for forward and backward*  
 430 *presented visual speech for different ROIs. Coherence values from occipital cortex indicating*

431 *significant differences between forward and backward tracking in the young group ( $p =$*   
432  *$0.0004$ ), but not in the older group ( $p = 0.467$ ), and also a difference between forward tracking*  
433 *in the young group and forward tracking in the older group ( $p = 0.004$ ). Coherence values from*  
434 *cingulum indicating significant differences between forward and backward tracking in the*  
435 *young group ( $p = 1.1e-07$ ), but not in the older group ( $p = 1.000$ ), and also a difference*  
436 *between forward tracking in the young group and forward tracking in the older group ( $p =$*   
437  *$0.0005$ ). Additional significant effects were observed between the forward tracking in the*  
438 *young group and the backward tracking in the older group ( $p = 0.002$ ). E) Correlation of*  
439 *formant-brain intelligibility index in significant voxels from cingulate cortex extracted from A*  
440 *showing a significant correlation with age ( $p = 4.99e-06$ ). F) Correlation of lip-brain intelligibility*  
441 *index in significant voxels from cingulate cortex extracted from A showing a not significant*  
442 *correlation with age ( $p = 0.368$ ). Blue lines depict regression lines, shaded areas depict*  
443 *standard error of mean (SE).*

444

### 445 **3.4 Intelligibility effects are mainly carried by young individuals**

446 To unravel the effects explained in sections 3.3, we reassessed the coherence values  
447 separately for forward and backward speech with respect to the age of our participants. Thus,  
448 we decided to split our sample into two age groups (younger vs. older) and calculated a 2x2  
449 ANOVA on the averaged voxels that we extracted from figure 3A for the former calculated  
450 formant-brain coherence (for forward and backward coherence, respectively). We again  
451 separated them into two ROIs (occipital cortex and cingulate cortex) and calculated for each  
452 an ANOVA with the factors age (young vs. older) and intelligibility (forward formant-brain  
453 coherence vs. backward formant-brain coherence). We did not find a main effect of age in  
454 occipital cortex ( $F(1, 49) = 0.981, p = 0.324$ ), but a main effect close to significance threshold  
455 of intelligibility ( $F(1, 49) = 3.627, p = 0.059$ ). We also found a distinct interaction effect between  
456 age and intelligibility ( $F(1, 49) = 15.723, p = 0.0001$ , Figure 3D, occipital cortex). To further  
457 investigate the interaction effect, we calculated a post-hoc test with Bonferroni correction,  
458 which revealed a significant difference between the forward and backward conditions in the  
459 young group ( $p = 0.0004$ ), but not in the older group ( $p = 0.467$ ). Furthermore, we discovered  
460 a significant difference between the forward condition in the young group and the forward  
461 condition in the older group ( $p = 0.004$ ), exhibiting that the young group is able to track the  
462 forward speech stronger than the older group. In cingulate cortex, we also did not find a main  
463 effect of age ( $F(1, 49) = 1.399, p = 0.239$ ), but here we found a main effect of intelligibility ( $F(1,$   
464  $49) = 16.474, p = 0.0001$ ). We also found a distinct interaction effect between age and  
465 intelligibility ( $F(1, 49) = 21.536, p = 1.1e-05$ , Figure 4D, cingulum). The Bonferroni corrected  
466 post-hoc test also revealed a significant difference between the forward and backward  
467 conditions in the young group ( $p = 1.1e-07$ ), but not in the older group ( $p = 1.000$ ). Additionally,



468 we found a significant difference between the forward condition in the young group and the  
469 forward condition in the older group ( $p = 0.0005$ ), strengthening our observation that the young  
470 group is able to distinguish more faithfully between forward and backward speech than the  
471 older group. In the cingulate cortex, we also found a significant difference between the forward  
472 condition in the young group and the backward condition in the older group ( $p = 0.002$ ). Here,  
473 we observe an additional effect in the older group, conveying that the ageing brain fails to  
474 distinguish between intelligible and unintelligible speech, and even exhibits a reverse pattern  
475 by tracking the presented backward speech more than the young group.

476

### 477 **3.5 Different frequency-bands show an age-related decline in different brain regions**

478 As a last step, we investigated if different frequency bands are impacted differently by age-  
479 related decline. Therefore, we repeated the analysis steps explained in 3.3, meaning that we  
480 calculated again a voxelwise correlation between the intelligibility index separately for our  
481 coherence conditions (lip-brain, envelope-brain, formant-brain and pitch-brain) and the age of  
482 the participants, but this time separately for the delta-band (1-3 Hz) and the theta-band (4-7  
483 Hz). For the delta-band, we again found a significant correlation between age and the  
484 intelligibility index just for the formant-brain index ( $p = 0.002$ , cluster-corrected). This effect  
485 was strongest in cingulate cortex (lowest  $t$ -value:  $-4.991$ , MNI [0 40 10], Figure 4A). No  
486 correlation occurred between age and the other indices (lip-brain index:  $p = 0.833$ ; envelope-  
487 brain index:  $p = 0.268$ ; pitch-brain index:  $p = 0.166$ , all cluster-corrected). Repeating the  
488 analysis for the theta-band revealed a similar picture: While we could find a significant  
489 correlation between the formant-brain index and age ( $p = 0.018$ , cluster-corrected) which was  
490 strongest in visual cortex (lowest  $t$ -value:  $-4.394$ , MNI [40 -90 0], Figure 4B), we did not find it  
491 for the remaining indices and age (lip-brain index:  $p = 1$ ; envelope-brain index:  $p = 0.096$ ;  
492 pitch-brain index:  $p = 0.675$ , all cluster-corrected). These results display a differential spatial  
493 pattern for different frequency bands: While tracking of intelligible speech in the theta-band  
494 declines reliably in visual cortex, tracking of the slower delta-band rather declines in cingulate  
495 cortex and frontal areas. We then extracted the values from the voxel with the lowest  $t$ -value  
496 (i.e. the most significant negative one) respectively for both frequency bands (delta-band:  
497 cingulate cortex, MNI [0 40 10]; theta-band: visual cortex, MNI [40 -90 0]) and again fitted a  
498 linear model for the formant-brain index to further clarify the effects found in the whole brain  
499 analysis. Age could significantly predict the formant-brain index in the delta-band in cingulate  
500 cortex ( $F(1, 48) = 24.4$ ,  $p = 9.885e-06$ ,  $\eta^2 = 0.337$ , Figure 4C) and in the theta-band in visual  
501 cortex ( $F(1, 48) = 18.92$ ,  $p = 7.089e-05$ ,  $\eta^2 = 0.282$ , Figure 4D). To further clarify if the tested  
502 relationship is specific to a certain frequency band and brain region, we also tested the vice  
503 versa relationship (i.e. the relationship between age and theta-band in cingulate cortex and  
504 the relationship between age and delta-band in occipital cortex). We found that while age could

505 not significantly predict the formant-brain index in the theta-band in cingulate cortex ( $F(1, 48)$   
506  $= 0.637$ ,  $p = 0.429$ ,  $\eta^2 = 0.01$ , Figure 4E), it could significantly predict the formant-brain index  
507 in the delta-band in occipital cortex ( $F(1, 48) = 6.757$ ,  $p = 0.012$ ,  $\eta^2 = 0.123$ , Figure 4F). This  
508 suggests that while the ability of the cingulate cortex to transform visual into phonological  
509 information declines just in the delta-band, the occipital cortex shows a decline over a broad  
510 range of frequencies and therefore in general visual speech processing.

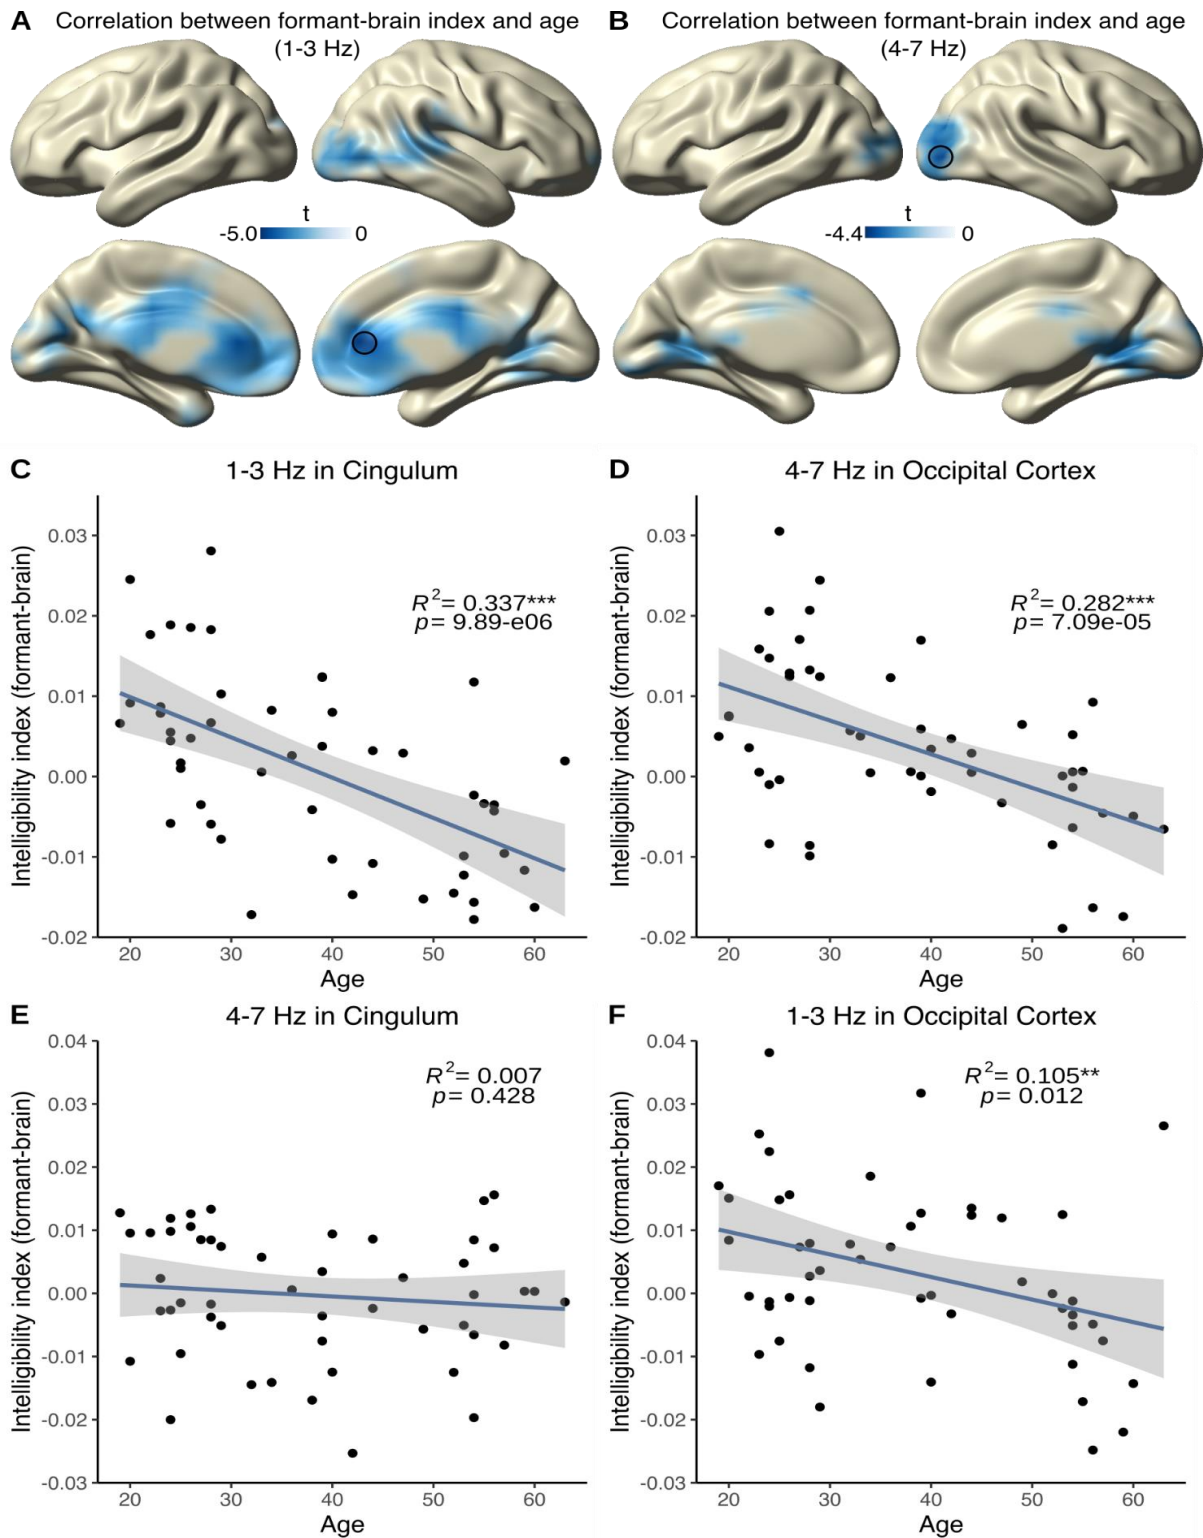

511

512 *Figure 4: Statistical values of the voxelwise correlation of the formant-brain index with age*  
 513 *split between delta-band and theta-band. A) Tracking of the intelligibility index in the delta-*  
 514 *band (1-3 Hz,  $p < 0.05$ , cluster-corrected) indicates a strong decrease of intelligibility*  
 515 *tracking in cingulate cortex and frontal areas. Black circle indicates lowest t-value extracted*  
 516 *for C and F. B) Tracking of the intelligibility index in the theta-band (4-7 Hz,  $p < 0.05$ , cluster-*  
 517 *corrected) indicates a strong decrease of intelligibility tracking in visual areas. Black circle*

518 *indicates lowest t-value extracted for D and E. C) Correlation of formant-brain intelligibility*  
519 *index in the voxel with the lowest t-value extracted from A (cingulate cortex) showing a*  
520 *significant decrease with age ( $p = 9.885e-06$ ) in the delta-band. D) Correlation of formant-*  
521 *brain intelligibility index in the voxel with the lowest t-value extracted from B (visual cortex)*  
522 *showing a significant decrease with age ( $p = 7.089e-05$ ) in the theta-band. E) Correlation of*  
523 *formant-brain intelligibility index in the voxel with the lowest t-value extracted from A*  
524 *(cingulate cortex) showing no significant decrease with age ( $p = 0.428$ ) in the theta-band. F)*  
525 *Correlation of formant-brain intelligibility index in the voxel with the lowest t-value extracted*  
526 *from B (occipital cortex) showing a significant decrease with age ( $p = 0.012$ ) also in the*  
527 *delta-band. Blue lines depict regression lines, shaded areas depict standard error of mean*  
528 *(SE).*

## 529 **4 Discussion**

530 Our study illustrates that during lip reading, the visual cortex represents multiple features of  
531 the speech signal in low frequency bands (1-7 Hz), importantly including the corresponding  
532 (unheard) acoustic signal. It has previously been shown that the visual cortex is able to track  
533 the intelligible global envelope (unheard acoustic speech envelope; Hauswald et al. 2018).  
534 We demonstrate here that the visual cortex is also able to track the modulation of intelligible  
535 spectral fine-details (unheard formants and pitch). Furthermore, we found that ageing is  
536 associated with a deterioration of this ability not only in the visual cortex, but also in the  
537 cingulate cortex. Disentangling delta and theta-band revealed that while the age-related  
538 decline of formant tracking is independent on frequency bands in visual cortex, it is unique in  
539 cingulate cortex for the delta-band. Our results suggest that visuo-phonological transformation  
540 processes are sensitive to age-related decline, in particular with regards to the modulation of  
541 unheard spectral fine-details.

542

### 543 ***Visuo-phonological transformation processes are observable for global amplitude*** 544 ***modulations and spectral-fine detail modulations***

545 As expected, the current study replicates the main finding from Hauswald et al. (2018) showing  
546 a visuo-phonological transformation process in visual cortex for the unheard speech envelope  
547 in an Italian speaking sample. Our study using a German speaking sample suggests that the  
548 postulated visuo-phonological transformation process at the level of the visual cortex is  
549 generalizable across languages. This is unsurprising as it is in line with studies on the speech  
550 envelope spectrum which show robust amplitude peaks between 3.5 and 4.5 Hz regardless of  
551 language (Poeppel & Assaneo, 2020), providing evidence that different languages carry  
552 similar temporal regularities not only for auditory properties, but also for visual properties  
553 (Chandrasekaran et al., 2009). We argue that this similarity is a key property for making the  
554 postulated visuo-phonological transformation process transferable to other languages.

555 By investigating different properties of auditory speech (global modulations vs. fine-detailed  
556 modulations) and how they are tracked by the human brain, our results are furthermore adding  
557 an important part to the understanding of how visual speech contributes to speech processing  
558 in general. As lip movements and amplitude modulations are highly correlated  
559 (Chandrasekaran et al., 2009), it is highly probable that amplitude modulations can be inferred  
560 by lip movements alone as a learned association. Here we can show that the brain is also able  
561 to perform a more fine-coarsed tracking than initially thought by especially processing the  
562 spectral fine-details that are modulated near the lips, another potentially learned association  
563 between lip-near auditory cues (i.e. merged F2 and F3 formants) and lip movements (Plass et  
564 al., 2020). Additionally, it is not only formants that are subject to visuo-phonological  
565 transformation, but also the fundamental frequency, as seen in our results. This is in line with

566 a recent study which shows that closing the lips is correlated with the tone falling (Garg et al.,  
567 2019). How those modulations are influenced by behavioural measures still needs to be  
568 discussed. Some studies suggest that enhanced lip reading abilities go in line with higher  
569 activation in visual areas in persons with a cochlear implant (e.g. Giraud et al., 2001). Our  
570 present results do not suggest that strong visuo-phonological transformation processes are  
571 sufficient for improved lip reading abilities. Yet, they may be most useful in disambiguating  
572 auditory signals in difficult listening situations.

573

574 ***Tracking of unheard formants accompanying lip movements is mostly affected in***  
575 ***ageing***

576 With regards to the ageing effect, we could show that various neural tracking mechanisms are  
577 differentially affected. Our study presents that tracking of unheard formants, especially the  
578 combined F2 and F3 formants, is declining with age, while there is still a preserved tracking of  
579 purely visual information (as seen in the lip-brain index, Figures 3C and 3F). Meanwhile, the  
580 tracking of the unheard speech envelope and pitch signify an inconclusive picture: While  
581 tracking of those properties seem to be preserved to some extent, both are showing a  
582 tendency to diminish with age.

583 Especially the formants and the pitch are part of the temporal fine-structure (TFS) of speech  
584 and are crucial for speech segregation or perceptual grouping for optimal speech processing  
585 in complex situations (Alain et al., 2017; Bregman et al., 1990). The TFS is different from the  
586 acoustic envelope in a sense that it does not display “coarse” amplitude modulations of the  
587 audio signal but rather fluctuations that are close to the centre frequency of certain frequency  
588 bands (Lorenzi et al., 2006). Hearing-impaired older participants show a relative deficit of the  
589 representation of the TFS compared to the acoustic envelope (Anderson et al., 2013; Lorenzi  
590 et al., 2006). The TFS also yields information when trying to interpret speech in fluctuating  
591 background noise (Moore, 2008). Other studies also point to the fact that especially when  
592 having cochlear hearing loss along with a normal audiometric threshold, the interpretation of  
593 the TFS is reduced, resulting in diminished speech perception under noisy conditions (Lorenzi  
594 et al., 2009). This suggests that hearing-impaired subjects mainly seem to use the temporal  
595 envelope to interpret auditory information (Moore & Moore, 2003), while normal hearing  
596 subjects can also use the presented temporal fine-structure. Interestingly, we found that even  
597 when the TFS is inferred from lip movements, there is a decline in the processing of spectral  
598 fine-details with age independent of hearing loss. Our results suggest that the visuo-  
599 phonological transformation of certain spectral fine-details like the formants are impacted the  
600 most in ageing, whereas the transformation of the pitch (or fundamental frequency) reveals a  
601 more complex picture: We find preserved tracking of the unheard pitch contour in occipital  
602 cortex, but a decline with age in the cingulate cortex. Interestingly, the cingulate cortex has

603 been found to show higher activation as response to processing of degraded speech (Erb &  
604 Obleser, 2013), pointing to a possible compensatory mechanism when processing distorted  
605 speech. How this altered processing of the unheard pitch (or fundamental frequency)  
606 accompanying lip movements in cingulate cortex has an impact on speech understanding  
607 needs to be discussed in further studies.

608 Further investigating the effects shown in our correlational analysis revealed that older  
609 participants seem to be less able to distinguish between forward and backward unheard  
610 speech (unheard formants) and that younger individuals show enhanced tracking of intelligible  
611 speech (Figure 3D). This could point to the fact that the older population is losing the gain of  
612 differentiating intelligible from unintelligible speech, obviously resulting in a less successful  
613 visuo-phonological transformation process. Other studies suggest that the older population  
614 seems to inefficiently use their cognitive resources, showing less deterioration of cortical  
615 responses (measured by the envelope reconstruction accuracy) to a foreign language  
616 compared to younger individuals (Presacco et al., 2016b) and also an association between  
617 cognitive decline and increased cortical envelope tracking or even higher synchronization of  
618 theta (Goossens et al., 2016). Auditory processing is also affected both in midbrain and cortex  
619 in age, exhibiting a large reduction of speech envelope encoding when presented with a  
620 competing talker, but at the same time a cortical overrepresentation of speech regardless of  
621 the presented noise, suggesting an imbalance between inhibition and excitation in the human  
622 brain (Presacco et al., 2016a) when processing speech. Other studies add to this hypothesis  
623 by showing decreasing alpha modulation in the ageing population (Henry et al., 2017; Vaden  
624 et al., 2012), strengthening the assumption that there is an altered interaction between age  
625 and cortical tracking even in the visual modality that needs to be investigated further.

626 Considering all acoustic details accompanying lip movements we still see a tendency of the  
627 speech envelope tracking to decline with age, suggesting that the transformation of the global  
628 speech dynamics could also be deteriorating. Overall, our results provide evidence that the  
629 transformation of fine-grained acoustic details seem to decline more reliably with age, while  
630 the transformation of global information (in our case the speech envelope) seems to be less  
631 impaired.

632

### 633 ***Possible implications for speech processing in challenging situations***

634 Our findings raise the question of how the decline in processing of unheard spectral fine-  
635 details negatively influences other relevant aspects of hearing. In light of aforementioned  
636 studies from the auditory domain of speech processing, we propose some thoughts on the  
637 multi-sensory nature of speech and how different sensory modalities can contribute to speech  
638 processing abilities under disadvantageous conditions (both intrapersonal and  
639 environmental).

640 As mentioned in the previous section, optimal hearing requires processing of both the temporal  
641 fine structure and the global acoustic envelope. However, especially under noisy conditions,  
642 processing the TFS becomes increasingly important for understanding speech. Ageing in  
643 general goes along with reduced processing of the TFS (Anderson & Karawani, 2020) and  
644 this deteriorating effect seems to be even more detrimental when ageing is accompanied by  
645 hearing loss (Anderson et al., 2013). Since listening in natural situations usually is a multi-  
646 sensory (audiovisual) phenomenon, we argue that the impaired visuo-phonological  
647 transformation process of TFS processing adds to the difficulties of older individuals to follow  
648 speech in challenging situations. To follow up this idea, future studies will need to quantify the  
649 benefit of audiovisual versus (unimodal) auditory processing, depending on different visuo-  
650 phonological transformation abilities.

651 Our results also have implications for listening situations when relevant visual input from the  
652 mouth area is obscured, a topic which has gained enormously in significance due to the wide  
653 adoption of face masks to counteract the spread of SARS-CoV-2. In general, listening  
654 becomes more difficult and performance declines (Brown et al., 2021) when the mouth area  
655 is obscured. While face masks may diminish attentional focusing as well as temporal cues,  
656 our work suggests that they also deprive the brain of deriving the acoustic TFS from the lip  
657 movements especially in the formant frequency range which are modulated near the lips (F2  
658 and F3). This issue, which should become relevant particularly in noisy situations, may be  
659 aggravated by the fact that face masks (especially highly protective ones) impact sound  
660 propagation of frequencies between 1600-6000 Hz with a peak around 2000 Hz (Caniato et  
661 al., 2021). Thus, face masks diminish relevant formant information in both sensory modalities.  
662 This could disproportionately affect hearing impaired listeners, an urgent question that should  
663 be followed up by future studies.

664 Overall, considering both the auditory and visual domain of speech properties, we suggest  
665 that the underlying cause of speech processing difficulties in naturalistic settings  
666 accompanying age or hearing impairment is more diverse than previously thought. The visual  
667 system provides the proposed visuo-phonological transformation process as an important  
668 mechanism for optimal speech understanding and crucially supports acoustic speech  
669 processing.

670

671 ***Occipital cortex and cingulate cortex show different tracking properties dependent on***  
672 ***the frequency-band***

673 With regards to different frequency bands, our results could yield important insights into  
674 different brain regions showing distinct formant tracking properties: While we find a robust  
675 decline of delta-band tracking with age in both occipital and cingulate cortex, theta-band  
676 tracking is reliably declining only in occipital areas. In general, theta is corresponding to the



677 frequency of syllables and to the modulations in the amplitude envelope (Gross et al., 2013;  
678 Keitel et al., 2018; Meyer, 2018; Poeppel & Assaneo, 2020), whereas delta seems to process  
679 phrasal chunks based on acoustic cues (Ghitza, 2017; Keitel et al., 2018) and is therefore  
680 responsible for a general perceptual chunking mechanism (Boucher et al., 2019). Our results  
681 also show that the visual cortex extracts information provided by the perception of the lip  
682 movements and connects them with phonological information that is already learned. This  
683 points to a possible top-down influence of stored syntactic information provided by delta-band  
684 tracking, which also seems to be deteriorating with increasing age both in occipital and  
685 cingulate cortex. Interestingly, age-related hearing loss also leads to a volume reduction in  
686 anterior cingulate cortex (Slade et al., 2020), which in turn also leads to more memory  
687 impairments and cognitive deficits (Belkhiria et al., 2019). These and our current results  
688 strengthen the notion that the cingulate cortex has an important function also in visual speech  
689 processing, as this also goes in line with the mentioned compensatory mechanism in anterior  
690 cingulate cortex (ACC) (Erb & Obleser, 2013). Together with the findings of the current study,  
691 this involvement of the cingulate cortex in speech processing (or in general the cingulo-  
692 opercular network; Peelle (2018)) underlines the fact that there seems to be a maladaptive  
693 processing strategy in frontal areas. To fully understand the mechanisms behind this visuo-  
694 phonological transformation process without the influence of ageing in distinct brain regions  
695 and frequency bands, it would be advisable for future studies to focus on younger individuals,  
696 especially since this study is the first to investigate the tracking of spectral fine-details  
697 extracted from the spectrogram.

698 **5 Conclusion**

699 The current study demonstrates that the visual cortex is able to track intelligible unheard  
700 spectral-fine detailed information just by observing lip movements. Crucially, we present a  
701 differential pattern for the processing of global and spectral fine-detailed intelligible  
702 information, with ageing affecting in particular tracking of spectral speech information (or the  
703 TFS), while showing partly preserved tracking of global modulations. Furthermore, we see a  
704 distinct age-related decline of tracking dependent on the brain region (i.e. visual and cingulate  
705 cortex) and on the frequency-band (i.e. delta and theta-band). The results presented here may  
706 have important implications for hearing in the ageing population, suggesting that hearing  
707 difficulties could also be exacerbated in natural audiovisual environments as a result of  
708 reduced capacities of visual benefit. With respect to the current pandemic situation, our results  
709 can provide a novel important insight on how missing visual input (e.g. when carrying face  
710 masks) is critical for speech comprehension.

711

712 **6 Competing Interest Statement**

713 The authors have declared no competing interest.

714

715 **7 Acknowledgements**

716 This work is supported by the Austrian Science Fund, P31230 (“Audiovisual speech  
717 entrainment in deafness”).

718

719 **8 Pre-registration**

720 The first part of the study analyses was pre-registered prior to the research being conducted  
721 under <https://osf.io/ndvf6/>.

722 **9 References**

- 723 Alain, C., Arsenault, J. S., Garami, L., Bidelman, G. M., & Snyder, J. S. (2017). Neural  
724 Correlates of Speech Segregation Based on Formant Frequencies of Adjacent  
725 Vowels. *Scientific Reports*, 7(1), 40790. <https://doi.org/10.1038/srep40790>
- 726 Anderson, S., & Karawani, H. (2020). Objective evidence of temporal processing deficits in  
727 older adults. *Hearing Research*, 397, 108053.  
728 <https://doi.org/10.1016/j.heares.2020.108053>
- 729 Anderson, S., Parbery-Clark, A., White-Schwoch, T., Drehobl, S., & Kraus, N. (2013). Effects  
730 of hearing loss on the subcortical representation of speech cues. *The Journal of the*  
731 *Acoustical Society of America*, 133(5), 3030–3038. <https://doi.org/10.1121/1.4799804>
- 732 Badin, P., Perrier, P., Boë, L., & Abry, C. (1990). Vocalic nomograms: Acoustic and  
733 articulatory considerations upon formant convergences. *The Journal of the Acoustical*  
734 *Society of America*, 87(3), 1290–1300. <https://doi.org/10.1121/1.398804>
- 735 Belkhiria, C., Vergara, R. C., San Martín, S., Leiva, A., Marcenaro, B., Martinez, M.,  
736 Delgado, C., & Delano, P. H. (2019). Cingulate Cortex Atrophy Is Associated With  
737 Hearing Loss in Presbycusis With Cochlear Amplifier Dysfunction. *Frontiers in Aging*  
738 *Neuroscience*, 11. <https://doi.org/10.3389/fnagi.2019.00097>
- 739 Bernstein, L. E., & Liebenthal, E. (2014). Neural pathways for visual speech perception.  
740 *Frontiers in Neuroscience*, 8. <https://doi.org/10.3389/fnins.2014.00386>
- 741 Boersma, P., & Weenink, D. (2019). *Praat: Doing phonetics by computer [Computer*  
742 *program]* (6.0.48) [Computer software].
- 743 Boucher, V. J., Gilbert, A. C., & Jemel, B. (2019). The Role of Low-frequency Neural  
744 Oscillations in Speech Processing: Revisiting Delta Entrainment. *Journal of Cognitive*  
745 *Neuroscience*, 31(8), 1205–1215. [https://doi.org/10.1162/jocn\\_a\\_01410](https://doi.org/10.1162/jocn_a_01410)
- 746 Bourguignon, M., Baart, M., Kapnoura, E. C., & Molinaro, N. (2020). Lip-Reading Enables  
747 the Brain to Synthesize Auditory Features of Unknown Silent Speech. *Journal of*  
748 *Neuroscience*, 40(5), 1053–1065. <https://doi.org/10.1523/JNEUROSCI.1101-19.2019>
- 749 Brainard, D. H. (1997). The psychophysics toolbox. *Spatial Vision*, 10(4), 433–436.

- 750 <https://doi.org/10.1163/156856897X00357>
- 751 Bregman, A. S., Liao, C., & Levitan, R. (1990). Auditory grouping based on fundamental  
752 frequency and formant peak frequency. *Canadian Journal of Psychology*, *44*(3), 400–  
753 413. <https://doi.org/10.1037/h0084255>
- 754 Brown, V. A., Engen, K. V., & Peelle, J. E. (2021). *Face mask type affects audiovisual*  
755 *speech intelligibility and subjective listening effort in young and older adults.*  
756 PsyArXiv. <https://doi.org/10.31234/osf.io/7waj3>
- 757 Caniato, M., Marzi, A., & Gasparella, A. (2021). How much COVID-19 face protections  
758 influence speech intelligibility in classrooms? *Applied Acoustics*, *178*, 108051.  
759 <https://doi.org/10.1016/j.apacoust.2021.108051>
- 760 Chandrasekaran, C., Trubanova, A., Stillitano, S., Caplier, A., & Ghazanfar, A. A. (2009).  
761 The Natural Statistics of Audiovisual Speech. *PLoS Computational Biology*, *5*(7).  
762 <https://doi.org/10.1371/journal.pcbi.1000436>
- 763 Crosse, M. J., Liberto, G. M. D., & Lalor, E. C. (2016). Eye Can Hear Clearly Now: Inverse  
764 Effectiveness in Natural Audiovisual Speech Processing Relies on Long-Term  
765 Crossmodal Temporal Integration. *Journal of Neuroscience*, *36*(38), 9888–9895.  
766 <https://doi.org/10.1523/JNEUROSCI.1396-16.2016>
- 767 Erb, J., & Obleser, J. (2013). Upregulation of cognitive control networks in older adults’  
768 speech comprehension. *Frontiers in Systems Neuroscience*, *7*.  
769 <https://doi.org/10.3389/fnsys.2013.00116>
- 770 Erb, J., Schmitt, L.-M., & Obleser, J. (2020). Temporal selectivity declines in the aging  
771 human auditory cortex. *eLife*, *9*, e55300. <https://doi.org/10.7554/eLife.55300>
- 772 Escoffier, N., Herrmann, C. S., & Schirmer, A. (2015). Auditory rhythms entrain visual  
773 processes in the human brain: Evidence from evoked oscillations and event-related  
774 potentials. *NeuroImage*, *111*, 267–276.  
775 <https://doi.org/10.1016/j.neuroimage.2015.02.024>
- 776 Feld, J., & Sommers, M. (2009). Lipreading, Processing Speed, and Working Memory in  
777 Younger and Older Adults. *Journal of Speech, Language, and Hearing Research*,

- 778 52(6), 1555–1565. [https://doi.org/10.1044/1092-4388\(2009/08-0137\)](https://doi.org/10.1044/1092-4388(2009/08-0137))
- 779 Garg, S., Hamarneh, G., Jongman, A., Sereno, J. A., & Wang, Y. (2019). Computer-vision  
780 analysis reveals facial movements made during Mandarin tone production align with  
781 pitch trajectories. *Speech Communication*, 113, 47–62.  
782 <https://doi.org/10.1016/j.specom.2019.08.003>
- 783 Ghitza, O. (2017). Acoustic-driven delta rhythms as prosodic markers. *Language, Cognition  
784 and Neuroscience*, 32(5), 545–561. <https://doi.org/10.1080/23273798.2016.1232419>
- 785 Giraud, A.-L., & Poeppel, D. (2012). Cortical oscillations and speech processing: Emerging  
786 computational principles and operations. *Nature Neuroscience*, 15(4), 511–517.  
787 <https://doi.org/10.1038/nn.3063>
- 788 Giraud, A.-L., Price, C. J., Graham, J. M., Truy, E., & Frackowiak, R. S. J. (2001). Cross-  
789 Modal Plasticity Underpins Language Recovery after Cochlear Implantation. *Neuron*,  
790 30(3), 657–664. [https://doi.org/10.1016/S0896-6273\(01\)00318-X](https://doi.org/10.1016/S0896-6273(01)00318-X)
- 791 Goossens, T., Vercammen, C., Wouters, J., & Wieringen, A. van. (2016). Aging Affects  
792 Neural Synchronization to Speech-Related Acoustic Modulations. *Frontiers in Aging  
793 Neuroscience*, 8. <https://doi.org/10.3389/fnagi.2016.00133>
- 794 Gross, J., Hoogenboom, N., Thut, G., Schyns, P., Panzeri, S., Belin, P., & Garrod, S. (2013).  
795 Speech Rhythms and Multiplexed Oscillatory Sensory Coding in the Human Brain.  
796 *PLOS Biology*, 11(12), e1001752. <https://doi.org/10.1371/journal.pbio.1001752>
- 797 Hartmann, T., & Weisz, N. (2020). An Introduction to the Objective Psychophysics Toolbox.  
798 *Frontiers in Psychology*, 11. <https://doi.org/10.3389/fpsyg.2020.585437>
- 799 Hauswald, A., Lithari, C., Collignon, O., Leonardelli, E., & Weisz, N. (2018). A Visual Cortical  
800 Network for Deriving Phonological Information from Intelligible Lip Movements.  
801 *Current Biology*, 28(9), 1453-1459.e3. <https://doi.org/10.1016/j.cub.2018.03.044>
- 802 Henry, M. J., Herrmann, B., Kunke, D., & Obleser, J. (2017). Aging affects the balance of  
803 neural entrainment and top-down neural modulation in the listening brain. *Nature  
804 Communications*, 8, ncomms15801. <https://doi.org/10.1038/ncomms15801>
- 805 Hopkins, K., Moore, B. C. J., & Stone, M. A. (2008). Effects of moderate cochlear hearing

- 806 loss on the ability to benefit from temporal fine structure information in speech. *The*  
807 *Journal of the Acoustical Society of America*, 123(2), 1140–1153.  
808 <https://doi.org/10.1121/1.2824018>
- 809 Keitel, A., Gross, J., & Kayser, C. (2018). Perceptually relevant speech tracking in auditory  
810 and motor cortex reflects distinct linguistic features. *PLOS Biology*, 16(3), e2004473.  
811 <https://doi.org/10.1371/journal.pbio.2004473>
- 812 Keitel, A., Gross, J., & Kayser, C. (2020). Shared and modality-specific brain regions that  
813 mediate auditory and visual word comprehension. *ELife*, 9, e56972.  
814 <https://doi.org/10.7554/eLife.56972>
- 815 Keitel, A., Ince, R. A. A., Gross, J., & Kayser, C. (2017). Auditory cortical delta-entrainment  
816 interacts with oscillatory power in multiple fronto-parietal networks. *NeuroImage*, 147,  
817 32–42. <https://doi.org/10.1016/j.neuroimage.2016.11.062>
- 818 Liberman, M. C. (2017). Noise-induced and age-related hearing loss: New perspectives and  
819 potential therapies. *F1000Research*, 6.  
820 <https://doi.org/10.12688/f1000research.11310.1>
- 821 Löhler, J., Akcicek, B., Kappe, T., Schlattmann, P., Wollenberg, B., & Schönweiler, R.  
822 (2014). Entwicklung und Anwendung einer APHAB-Datenbank. *HNO*, 62(10), 735–  
823 745. <https://doi.org/10.1007/s00106-014-2915-4>
- 824 Lorenzi, C., Debrulle, L., Garnier, S., Fleuriot, P., & Moore, B. C. J. (2009). Abnormal  
825 processing of temporal fine structure in speech for frequencies where absolute  
826 thresholds are normal. *The Journal of the Acoustical Society of America*, 125(1), 27–  
827 30. <https://doi.org/10.1121/1.2939125>
- 828 Lorenzi, C., Gilbert, G., Carn, H., Garnier, S., & Moore, B. C. J. (2006). Speech perception  
829 problems of the hearing impaired reflect inability to use temporal fine structure.  
830 *Proceedings of the National Academy of Sciences*, 103(49), 18866–18869.  
831 <https://doi.org/10.1073/pnas.0607364103>
- 832 Maris, E., & Oostenveld, R. (2007). Nonparametric statistical testing of EEG- and MEG-data.  
833 *Journal of Neuroscience Methods*, 164(1), 177–190.

- 834 <https://doi.org/10.1016/j.jneumeth.2007.03.024>
- 835 Mattout, J., Henson, R. N., & Friston, K. J. (2007, June 25). *Canonical Source*  
836 *Reconstruction for MEG* [Research Article]. Computational Intelligence and  
837 Neuroscience; Hindawi. <https://doi.org/10.1155/2007/67613>
- 838 Meyer, L. (2018). The neural oscillations of speech processing and language  
839 comprehension: State of the art and emerging mechanisms. *European Journal of*  
840 *Neuroscience*, 48(7), 2609–2621. <https://doi.org/10.1111/ejn.13748>
- 841 Moore, B. C. J. (2008). The Role of Temporal Fine Structure Processing in Pitch Perception,  
842 Masking, and Speech Perception for Normal-Hearing and Hearing-Impaired People.  
843 *Journal of the Association for Research in Otolaryngology*, 9(4), 399–406.  
844 <https://doi.org/10.1007/s10162-008-0143-x>
- 845 Moore, B. C. J., & Moore, G. A. (2003). Discrimination of the fundamental frequency of  
846 complex tones with fixed and shifting spectral envelopes by normally hearing and  
847 hearing-impaired subjects. *Hearing Research*, 182(1), 153–163.  
848 [https://doi.org/10.1016/S0378-5955\(03\)00191-6](https://doi.org/10.1016/S0378-5955(03)00191-6)
- 849 Nolte, G. (2003). The magnetic lead field theorem in the quasi-static approximation and its  
850 use for magnetoencephalography forward calculation in realistic volume conductors.  
851 *Physics in Medicine & Biology*, 48(22), 3637. [https://doi.org/10.1088/0031-](https://doi.org/10.1088/0031-9155/48/22/002)  
852 [9155/48/22/002](https://doi.org/10.1088/0031-9155/48/22/002)
- 853 O'Brien, F., & Cousineau, D. (2014). Representing Error bars in within-subject designs in  
854 typical software packages. *Tutorials in Quantitative Methods for Psychology*, 10(1),  
855 56–67.
- 856 Oostenveld, R., Fries, P., Maris, E., & Schoffelen, J.-M. (2011). FieldTrip: Open source  
857 software for advanced analysis of MEG, EEG, and invasive electrophysiological data.  
858 *Intell. Neuroscience*, 2011, 1:1-1:9. <https://doi.org/10.1155/2011/156869>
- 859 O'Sullivan, A. E., Crosse, M. J., Di Liberto, G. M., & Lalor, E. C. (2017). Visual Cortical  
860 Entrainment to Motion and Categorical Speech Features during Silent Lipreading.  
861 *Frontiers in Human Neuroscience*, 10. <https://doi.org/10.3389/fnhum.2016.00679>



- 862 Park, H., Kayser, C., Thut, G., & Gross, J. (2016). Lip movements entrain the observers' low-  
863 frequency brain oscillations to facilitate speech intelligibility. *ELife*, 5, e14521.  
864 <https://doi.org/10.7554/eLife.14521>
- 865 Peelle, J. E. (2018). Listening Effort: How the Cognitive Consequences of Acoustic  
866 Challenge Are Reflected in Brain and Behavior. *Ear and Hearing*, 39(2), 204–214.  
867 <https://doi.org/10.1097/AUD.0000000000000494>
- 868 Plass, J., Brang, D., Suzuki, S., & Grabowecky, M. (2020). Vision perceptually restores  
869 auditory spectral dynamics in speech. *Proceedings of the National Academy of*  
870 *Sciences*. <https://doi.org/10.1073/pnas.2002887117>
- 871 Poeppel, D., & Assaneo, M. F. (2020). Speech rhythms and their neural foundations. *Nature*  
872 *Reviews Neuroscience*, 1–13. <https://doi.org/10.1038/s41583-020-0304-4>
- 873 Presacco, A., Simon, J. Z., & Anderson, S. (2016a). Evidence of degraded representation of  
874 speech in noise, in the aging midbrain and cortex. *Journal of Neurophysiology*,  
875 116(5), 2346–2355. <https://doi.org/10.1152/jn.00372.2016>
- 876 Presacco, A., Simon, J. Z., & Anderson, S. (2016b). Effect of informational content of noise  
877 on speech representation in the aging midbrain and cortex. *Journal of*  
878 *Neurophysiology*, 116(5), 2356–2367. <https://doi.org/10.1152/jn.00373.2016>
- 879 Slade, K., Plack, C. J., & Nuttall, H. E. (2020). The Effects of Age-Related Hearing Loss on  
880 the Brain and Cognitive Function. *Trends in Neurosciences*, 43(10), 810–821.  
881 <https://doi.org/10.1016/j.tins.2020.07.005>
- 882 Smith, Z. M., Delgutte, B., & Oxenham, A. J. (2002). Chimaeric sounds reveal dichotomies in  
883 auditory perception. *Nature*, 416(6876), 87–90. <https://doi.org/10.1038/416087a>
- 884 Suess, N., Hauswald, A., Zehentner, V., Depireux, J., Herzog, G., Rösch, S., & Weisz, N.  
885 (2021). *Influence of linguistic properties and hearing impairment on lip reading skills*  
886 *in the German language*. PsyArXiv. <https://doi.org/10.31234/osf.io/rcfxv>
- 887 Sumbly, W. H., & Pollack, I. (1954). Visual Contribution to Speech Intelligibility in Noise. *The*  
888 *Journal of the Acoustical Society of America*, 26(2), 212–215.  
889 <https://doi.org/10.1121/1.1907309>

- 890 Taulu, S., Simola, J., & Kajola, M. (2005). Applications of the signal space separation  
891 method. *IEEE Transactions on Signal Processing*, *53*(9), 3359–3372.  
892 <https://doi.org/10.1109/TSP.2005.853302>
- 893 Tun, P. A., & Wingfield, A. (1999). One Voice Too Many: Adult Age Differences in Language  
894 Processing With Different Types of Distracting Sounds. *The Journals of Gerontology:*  
895 *Series B*, *54B*(5), P317–P327. <https://doi.org/10.1093/geronb/54B.5.P317>
- 896 Tye-Murray, N., Sommers, M. S., & Spehar, B. (2007a). Audiovisual Integration and  
897 Lipreading Abilities of Older Adults with Normal and Impaired Hearing. *Ear and*  
898 *Hearing*, *28*(5), 656–668. <https://doi.org/10.1097/AUD.0b013e31812f7185>
- 899 Tye-Murray, N., Sommers, M., & Spehar, B. (2007b). The Effects of Age and Gender on  
900 Lipreading Abilities. *Journal of the American Academy of Audiology*, *18*(10), 883–  
901 892.
- 902 Tzourio-Mazoyer, N., Landeau, B., Papathanassiou, D., Crivello, F., Etard, O., Delcroix, N.,  
903 Mazoyer, B., & Joliot, M. (2002). Automated Anatomical Labeling of Activations in  
904 SPM Using a Macroscopic Anatomical Parcellation of the MNI MRI Single-Subject  
905 Brain. *NeuroImage*, *15*(1), 273–289. <https://doi.org/10.1006/nimg.2001.0978>
- 906 Vaden, R. J., Hutcheson, N. L., McCollum, L. A., Kentros, J., & Visscher, K. M. (2012). Older  
907 adults, unlike younger adults, do not modulate alpha power to suppress irrelevant  
908 information. *NeuroImage*, *63*(3), 1127–1133.  
909 <https://doi.org/10.1016/j.neuroimage.2012.07.050>
- 910 Veen, B. D. V., Drongelen, W. V., Yuchtman, M., & Suzuki, A. (1997). Localization of brain  
911 electrical activity via linearly constrained minimum variance spatial filtering. *IEEE*  
912 *Transactions on Biomedical Engineering*, *44*(9), 867–880.  
913 <https://doi.org/10.1109/10.623056>
- 914 Wong, P. C. M., Jin, J. X., Gunasekera, G. M., Abel, R., Lee, E. R., & Dhar, S. (2009). Aging  
915 and cortical mechanisms of speech perception in noise. *Neuropsychologia*, *47*(3),  
916 693–703. <https://doi.org/10.1016/j.neuropsychologia.2008.11.032>
- 917

918

919

920
